1 Title page

2  
3 **Main Manuscript for**

4  
5 **Temporal restriction of RNAi reveals breakdown of the segmentation clock is reversible after**  
6 **knock down of primary pair rule genes but not Wnt-signaling in the red flour beetle**

7  
8 Felix Kaufholz<sup>1,2#</sup>, Julia Ulrich<sup>2#</sup>, Muhammad Salim Hakeemi<sup>2</sup>, Gregor Bucher<sup>2\*</sup>

9  
10 <sup>1</sup>Göttingen Graduate School for Neurosciences, Biophysics, and Molecular Biosciences (*GGNB*)

11 <sup>2</sup>Johann-Friedrich-Blumenbach-Institut, GZMB, Universität Göttingen, Justus-von-Liebig-Weg 11,  
12 37077, Göttingen, Germany

13  
14  
15 *#: these authors contributed equally*

16 \*Corresponding author: Gregor Bucher

17 **Email:** [gbucher1@uni-goettingen.de](mailto:gbucher1@uni-goettingen.de)

18  
19 **Author Contributions:** FK: Investigation, formal data analysis, visualization of the data shown in  
20 the main paper; JU: Investigation, formal data analysis, visualization of the establishment of the new  
21 tool and of data shown in the supplementary; MSH: Investigation on other uses of the inhibitor; GB:  
22 Conceptualization, funding acquisition, supervision, writing the original draft.

23  
24 **Competing Interest Statement:** The authors declare no competing interests.

25  
26 **Classification:** Biological Sciences, Developmental Biology

27  
28  
29 **Keywords:** Insect segmentation, clock and wavefront/speed gradient model, segmentation  
30 breakdown, RNAi, transgenic tool

31  
32  
33 **Significance statement:** The generation of repetitive body parts during embryonic segmentation  
34 has been of key interest to developmental biologists, who usually used permanent knock-down of  
35 gene function for their studies. Using a new tool to temporally stop a gene knock-down effect, we find  
36 both robust and labile feedback-loops within the segmentation machinery. Thereby, the embryo may  
37 ensure that only one trunk is formed but that trunk formation is robust against external disturbance.

38  
39 **This PDF file includes:**

40 Main Text

41 Figures 1 to 6

42 Supplementary data

43

## 44 Abstract

45 Animals from all major clades have evolved a segmented trunk, reflected for instance in the  
46 repetitive organization of the human spine or the insect segments. These units emerge during  
47 embryonic segmentation from a posterior segment addition zone, where repetitive gene activity is  
48 regulated in a spatiotemporal dynamic described by the clock and wavefront/speed gradient model.  
49 This model has been tested in the red flour beetle *Tribolium castaneum* and other insects by studying  
50 the effect of the RNAi knockdown of segmentation genes. For upstream components such as primary  
51 pair rule genes, caudal or Wnt pathway components, this treatment often led to the breakdown of  
52 segmentation. However, it has remained untested, how the system would react to a temporally  
53 limited interruption of gene function. In order to ask such questions, we established a novel  
54 experimental system in *T. castaneum*, which allows blocking an ongoing RNAi effect with temporal  
55 control by expressing a viral inhibitor of RNAi. We show that the *T. castaneum* segmentation  
56 machinery re-established after we blocked an ongoing RNAi response targeting the primary pair rule  
57 genes *Tc-eve*, *Tc-odd* and *Tc-runt*. However, we observed no rescue after blocking RNAi responses  
58 targeting Wnt pathway components. We conclude that the insect segmentation system contains  
59 both, robust feedback-loops that can re-establish and labile feedback loops that can breakdown  
60 irreversibly. This combination may reconcile two partially conflicting needs of the embryonic  
61 regulation of segmentation: A tightly controlled initiation and maintenance of the SAZ by labile  
62 feedback-loops ensures that only one segment addition zone is formed. Conversely, robust feedback-  
63 loops confer developmental robustness required for proper segmentation, which may be challenged  
64 by internal or external disturbances. Our results ponder the insect segmentation machinery from a  
65 different angle and introduce a new experimental tool for temporal control on RNAi.  
66

## 67 Introduction

68 A striking feature of many animal body plans is their subdivision into repetitive units and clades  
69 with segmented bodies, namely vertebrates, annelids and arthropods, are found in all major branches  
70 of animal phylogeny (1–3). The repetitive design facilitated the evolution of an amazing  
71 morphological and functional diversification along the body axis, contributing to the evolutionary  
72 success of these clades. In most vertebrates and arthropods, embryonic segmentation is generated  
73 by a posterior clock-like mechanism that uses temporal oscillations of gene activity to generate  
74 repetitive spatial patterns (1, 4). Most experiments studying the clock in insects used parental RNAi  
75 (5), which leads to knock-down of gene function from the beginning of development. Hence, these  
76 experiments revealed only the first essential function of the respective genes and later aspects of the  
77 segmentation clocks have remained inaccessible to functional investigations. Here, we present a  
78 novel tool for shutting down an ongoing RNAi response with temporal control. We use this method  
79 to ask the novel question, whether the segmentation clock can re-establish itself after it has broken  
80 down as consequence of a knock-down of key segmentation genes.

81 In insects, the process of embryonic segmentation has been best studied best in *D. melanogaster*  
82 *melanogaster*, where a hierarchically organized gene regulatory network (GRN) leads to an almost  
83 simultaneous formation of all segments (6, 7). In most insects, however, segments are added  
84 sequentially from a posterior segment addition zone (SAZ) (1, 1–3). In those animals, a clock-like  
85 mechanism seems to sequentially generate the segment boundaries (8–11). Intriguingly, the logic  
86 underlying the insect segmentation clock is similar to the one of the vertebrate somitogenesis clock  
87 although the involved genes differ (4, 12, 13). The red flour beetle *T. castaneum* has been the main  
88 insect model organism for studying the segmentation clock of insects. Current models on its  
89 molecular setup have been discussed extensively in recent reviews (1, 4) such that only briefly  
90 outline will be given here. In principle, the clock acting in the SAZ consists of two components: A  
91 gene or GRN able to oscillate in a cell autonomous way in the SAZ and a posterior to anterior  
92 signaling gradient called speed regulation gradient. This gradient across the SAZ remains stable  
93 throughout segmentation and activates the cellular oscillator in a concentration dependent way. The  
94 combination of both components leads to dynamic on and off states of oscillator gene expression in  
95 pseudo-waves initiating in broad domains at the posterior, moving towards the anterior SAZ while  
96 becoming narrower and eventually stalling at the anterior boundary of the SAZ to form a new  
97 segment boundary. In this work, we use the concept of “speed regulation” instead of the initially  
98 suggested “wave front” concept, which actually represents an extreme case of speed regulation (14).  
99 In *T. castaneum*, Wnt signaling at the posterior pole of the SAZ is autoregulatory and it activates *Tc-*  
100 *caudal* expression (15–17). A feedback loop between *Tc-caudal* and Wnt signaling has been  
101 suggested based on respective spider data and based on the fact that knock-down of both is required  
102 for the generation of double head embryos in *T. castaneum* (15, 18). One or both components may  
103 function as the molecular realization of the speed regulation gradient (19, 20). *Tc-caudal*, *Tc-dichaete*  
104 and *Tc-odd-paired* have been termed timing factors reflecting their subsequent functions in *D.*  
105 *melanogaster* segmentation and their expression in the *T. castaneum* in SAZ in patterns compatible  
106 with similar temporal input to the clock (21). The primary pair rule genes (pPRGs) *Tc-even-skipped*  
107 (*Tc-eve*), *Tc-runt* and *Tc-odd-skipped* (*Tc-odd*) are the oscillating genes (8, 11) while *Tc-hairy* may have  
108 lost an ancestrally essential function in *T. castaneum* (1, 22). Regulatory interactions among the  
109 pPRGs are thought to realize the negative feedback loop required for the oscillator. Together, they  
110 regulate the expression of the secondary pair rule genes *Tc-paired* (*Tc-prd*) and *Tc-sloppy-paired*,  
111 which eventually turn on the segment polarity genes such as *Tc-wingless* (*Tc-wg*) (23, 24). The

112 expression of *Tc-eve* in stripes in the SAZ and *Tc-wg* marking established segment boundaries are  
113 shown in Fig. 1A. Different regulatory interactions among the pPRG oscillator genes have been  
114 proposed to explain their expression patterns (8). Different from vertebrates, there is another clock  
115 ticking in parallel to the periodic pPRG based clock. This non-periodic clock is formed by the *T.*  
116 *castaneum* gap genes and is probably under the control of the same speed regulation gradient. It  
117 leads to the one-time sequential activation of the different gap genes (20, 25). While it has become  
118 clear that gap genes regulate Hox gene expression for regionalization of the body, they may provide  
119 additional input for pPRG regulation as well. Interestingly, the knock-down of several gap gene  
120 orthologs led to a complete breakdown of segmentation (22, 26–28).

121 These insights were deduced from modelling, gene expression patterns and from knocking-down  
122 gene function by parental RNAi. In the latter experimental approach, dsRNA is injected into female  
123 beetles, who transmit the RNAi effect to their offspring, which consequently suffers from the RNAi  
124 knock-down from earliest embryonic stages onwards. Hence, strictly spoken, the interactions found  
125 in these studies are valid for the first rounds of oscillation while later interactions might differ.  
126 Unfortunately, the available techniques did not allow studying the later stages of the clock  
127 independently from its initiation. As consequence, it has remained unclear, whether the observed  
128 breakdown of segmentation after early knock-down of pPRGs was irreversible or, alternatively, that a  
129 continued depletion of gene function was required to induce that drastic phenotype. Similarly, it has  
130 remained unclear, whether the observed Wnt autoregulation at the posterior pole was sufficient for  
131 maintaining Wnt ligand expression or, alternatively, whether an as yet unknown upstream factor was  
132 required for maintaining Wnt signalling at the posterior pole. Finally, it has remained unclear, in how  
133 far the network active in the SAZ would be able to re-establish itself after it had broken down.

134 In order to answer these questions and to open up new experimental possibilities more generally,  
135 we developed a system for blocking an ongoing RNAi response with temporal control. For that  
136 purpose, we used viral suppressors of RNAi (VSRs), which are proteins that evolved to rescue viruses  
137 from the RNAi immune response of the host. We found that heat-shock mediated expression of one  
138 VSR, CrPV1A, efficiently blocked the RNAi response in *T. castaneum*. Using this tool, we found that  
139 the segmentation breakdown due to pPRG RNAi was reversible, i.e. the system re-established itself  
140 once the knock-down was suppressed. In contrast, the breakdown observed after knocking down  
141 Wnt signaling components was irreversible. This is evidence that the Wnt autoregulatory loop is at  
142 the top of speed regulation gradient maintenance.

143  
144  
145  
146  
147  
148

## 149 Results

### 150 ***Establishing a viral suppressor of RNAi as a tool in *T. castaneum****

151 RNAi is an anti-viral defense and viruses evolved proteins to interfere with that process. A variety  
152 of viral suppressors of RNAi (VSRs) from insect and plant viruses have been described (29–36). Based  
153 on the conservation of the proteins involved in RNAi (37) and the proven functionality of some of  
154 these inhibitors in flies, we assumed that VSRs might be able to block RNAi in *T. castaneum* as well.  
155 To test this, we generated transgenic lines for six VSRs where the VSR expression was under the  
156 control of the Gal4 controlled UAS-enhancer (38, 39). These lines were tested for their efficacy in  
157 suppressing RNAi in *T. castaneum* by two independent tests. We used two different Gal4 driver lines  
158 and tested the rescue of an endogenous gene and a heterologous gene expressed from a transgenic  
159 construct (see Supplementary Text 1 for experimental details and results). Only the VSR CrPV1A  
160 derived from the *Cricket Paralysis Virus* showed strong reduction of the RNAi effect in both tests  
161 while FHV B2 from the *Flock House Virus* showed some effect in one test (see Supplementary Text 1).  
162 Hence, we decided to use CrPV1A for our purpose. The CrPV1A protein is responsible for the high  
163 pathogenicity of the *Cricket Paralysis Virus* by interacting with the endonuclease Ago-2, a component  
164 of the RISC complex (see Supplementary Text 2 for further information). In *D. melanogaster*, it did  
165 not interfere with the miRNA pathway (33). However, we were not able to generate transgenic lines  
166 with a high level of ubiquitous CrPV1A activity despite many trials. Therefore, we hypothesize that  
167 strong ubiquitous VSR expression may affect viability – possibly via blocking the miRNA pathway.  
168 Taken together, our results identified CrPV1A as a potent inhibitor of RNAi in *T. castaneum*.

### 169 ***Temporal control of RNAi by heat-shock mediated VSR expression***

170 In order to gain temporal control on RNAi, we established transgenic lines where CrPV1A was  
171 under the control of the *T. castaneum* heat-shock promoter (hsVSR) (40). In order to test the hsVSR  
172 for applicability for the segmentation process, we performed several control experiments. As positive  
173 control, we chose the secondary pair-rule gene *Tc-paired* (*Tc-prd*), which is a downstream gene of the  
174 segmentation clock (23, 24). Therefore, rescue of segmentation by VSR expression was expected  
175 because the segmentation clock does not breakdown in *Tc-prd* RNAi. We performed parental RNAi of  
176 *Tc-prd* in our hsVSR line. The RNAi embryos were either not heat-shocked or were treated with heat-  
177 shocks during one of three different time windows during germ band elongation (see scheme in Fig.  
178 1B). In the absence of a heat-shock, the L1 larval cuticles displayed the published pair-rule-gene  
179 phenotype where the number of abdominal segments was halved to a median of four abdominal  
180 segments (Fig 2A,B hs<sup>neg</sup>, J) (23, 24). Heat-shock mediated VSR expression at 10-13 h after egg laying  
181 (32°C) rescued the abdominal segment number to a median of 7.5 abdominal segments, i.e. almost  
182 to wildtype (Fig 2B, hsVSR 10-13h). Some rescue of more anterior segments was observed as well, i.e.  
183 Md (25%), Lab (30%) and the second thoracic segment (80%) (Fig. 2A). Later VSR expression (13-16 h  
184 after egg laying) rescued to a median number of only six abdominal segments (Fig 2B, hsVSR 13-16h)  
185 while the latest heat-shock (16-19h) failed to rescue abdominal segments (Fig. 2B, hsVSR 16-19h). In  
186 our negative controls, i.e. *Tc-prd* RNAi in *vermillion white* (*vw*) wildtype, the cuticles showed no  
187 rescue irrespective of whether heat-shock was applied or not (Fig 2A-B). Taken together, this  
188 experiment showed that rescue of the segmentation process from an ongoing RNAi effect was  
189 possible by blocking RNAi with our hsVSR (see Fig. S1G,H for an independent replicate of this  
190 experiment done by another experimenter).

191 As negative control, we tested *Tc-torso* (*Tc-tor*). In *T. castaneum*, Torso signaling is active at the  
192 posterior pole in early embryos but not during elongation. Hence, it was suggested to be required for  
193 establishment of the SAZ and to initiate posterior elongation but was unlikely to be required for  
194 maintaining it (41). Therefore, blocking RNAi targeting Torso signaling during elongation should not  
195 have an effect on posterior segmentation. In line with previous results, our RNAi experiments  
196 targeting of *Tc-tor* resulted in the loss of most abdominal segments with a median of 1.5 abdominal  
197 segments remaining (blue box in Fig. 2D) while the anterior segments remained unaffected (Fig. 2C)  
198 (41). As predicted, no rescue of abdominal segments was observed by hs-induced VSR expression for  
199 neither time point (green boxes in Fig. 2D).

200 Finally, to test for unspecific effects induced by the hs-treatment, we performed the same  
201 experiments in the hsVSR line and the vw wildtype strain, which is the genetic background for the  
202 hsVSR line. Indeed, the heat-shock treatment alone led to some reduction of abdominal segments.  
203 This was obvious in heat-shocked animals of wildtype (Fig. 2B, light red boxes) and in of hsVSR  
204 animals without previous RNAi treatment (Fig. S1F). In line with this apparently non-specific effect of  
205 heat-shocks and/or VSR expression, the RNAi defects increased in heat-shocked animals in both, *Tc-*  
206 *tor* (Fig. 2D – compare green to blue boxes) and *Tc-paired* knock-down embryos (Fig. S1H). In  
207 conclusion, the overall effects observed after RNAi and heat-shock induced rescue is composed of  
208 three additive effects: First, the reduction of segments resulting from the specific RNAi effect (Fig. 1D  
209 – second box). Second, additional reduction due to unspecific heat-shock and/or VSR defects (Fig. 1D  
210 arrow 3) and third, rescue by blocking the RNAi effect by VSR expression (Fig. 1D, arrow 1). The  
211 observed overall phenotype results from the combination of these partially opposing effects (Fig. 1D  
212 arrow 2).

213 In summary, these proof of principle experiments showed that the hsVSR system was able to  
214 inhibit an ongoing RNAi response where the 10-13 h time window (and to lesser degree the 13-16 h  
215 window) appeared optimal for effects on the segmentation process. Further, they revealed side  
216 effects induced by the heat-shock treatment.

217  
218

### 219 ***Interfering with Wnt signaling leads to an irreversible segmentation breakdown***

220 Parental RNAi targeting several segmentation genes led to the loss of all posterior segments,  
221 indicating a breakdown of the segmentation machinery. This phenotype is observed for some gap  
222 gene orthologs, primary pair rule genes, the terminal gene torso and two components of the  
223 segment addition zone (SAZ), namely caudal and Wnt signaling (8, 26–28, 41–43). In all these  
224 experiments, the genes were knocked down throughout development by parental RNAi. Therefore, it  
225 has remained unclear, whether the phenotype reflected an irreversible breakdown of segmentation  
226 or whether continued depletion of the respective component was required for the continuous loss of  
227 posterior segments.

228 Our new system allowed us for the first time asking whether the segmentation breakdown  
229 observed in those RNAi experiments was reversible or not. Wnt signaling and *Tc-caudal* expression  
230 are found in the SAZ throughout elongation and respective RNAi experiments led to a segmentation  
231 breakdown (42, 43). It was suggested that Wnt regulates *Tc-caudal*, which in turn represents a speed  
232 regulation gradient, which is required to regulate the segmentation clock acting in the SAZ. (4, 19).  
233 Indeed, autoregulation of Wnt signaling and activation of *Tc-caudal* by Wnt signaling was shown  
234 previously for *T. castaneum* (17, 19). It should be noted that in more basal insects and a spider,  
235 interfering with Wnt signaling had similar drastic effects on segmentation but the Wnt-cad

236 interactions suggested above were not fully confirmed there (44). At least in *T. castaneum*, an  
237 autoregulatory loop is suggested to ensure the continuous expression of these components in the  
238 SAZ. Hence, interrupting the loop could lead to an irreversible breakdown. Alternatively, if a so far  
239 unknown upstream signal located in the posterior SAZ was required for their maintenance, the  
240 system would be able to re-establish itself. In order to distinguish between these possibilities, we  
241 analyzed *Tc-WntD/8*, which together with the Wnt pathway component *Tc-wntless (Tc-wls)* is  
242 required for posterior segmentation, which is also true for the Wnt receptor *Tc-arrow (Tc-arr)* (42,  
243 45). Besides that role in the SAZ, Wnt is also required for later aspects of segmentation such as the  
244 formation of parasegment boundaries. Therefore, the RNAi phenotypes are a mix of early and late  
245 functions, which needs to be considered when interpreting the rescue effect. In line with published  
246 results, our *Tc-WntD/8+Tc-wls* double RNAi and *Tc-arrow* single RNAi resulted in two classes of  
247 phenotypes: Completely unsegmented cuticles and “empty egg phenotypes” (ee-phenotype). The ee-  
248 phenotype describes eggshells that do not contain embryonic cuticle, because the embryos stopped  
249 development before secreting cuticle while the former are a combination of early and late  
250 segmentation defects. We found roughly 40-45% empty eggs for both RNAi treatments (Fig. 2E,G,  
251 blue bar in left panel). Most cuticles showed an unsegmented phenotype (90-100%) (blue bars in  
252 “unsegm” column of right panel in Fig. 2E and G). hsVSR expression at 10-13h slightly reduced the  
253 portion of the ee-phenotype (Fig. 2E and G, green bars in left panels). Strikingly, the portion of  
254 unsegmented cuticles dropped dramatically (to roughly 5% for both RNAi treatments, see Fig. 2E and  
255 G, compare green to blue bars). The anterior pre-gnathal structures (labrum and antennae) were  
256 rescued more strongly than gnathal and thoracic segments. However, no rescue of abdominal  
257 segments was observed for the early treatment (Fig. 2F and H; 10-13h). Later VSR expression (13-  
258 16h), showed a similar result (Fig 2. E,G; light green bars) but we observed some cuticles with an  
259 increased number of abdominal segments after late VSR treatment in the *Tc-arr* RNAi but not *Tc-*  
260 *WntD/8;Tc-wls* RNAi (Fig. 2F, 13-16h). The lack of posterior rescue cannot be due to failed RNAi  
261 inhibition, because the clear anterior rescue shows effective inhibition of RNAi by our hsVSR (see Fig.  
262 S2 for a biological replicate of both experiments done by another experimenter with similar results).  
263 We ascribe the minor posterior rescue seen in the *Tc-arr* experiments (Fig. 2E,F) to the mentioned  
264 later Wnt functions (e.g. the formation of segment boundaries) for two reasons: First, the rescue  
265 effect increased with the later heat-shocks. This is in contrast to the expectation for upstream  
266 components of the SAZ, where a later rescue should only be able to rescue the most posterior  
267 segments as was observed in our positive control *Tc-prd* (Fig. 2A,B). Second, those structures, which  
268 form independently of the SAZ but need other aspects of Wnt signaling (labrum and antenna) are  
269 rescued to a high degree. Third, we do not see rescue when targeting *Wnt8*, which is exclusively  
270 expressed in the SAZ (46).

271 In summary, our analyses indicated that the breakdown of abdominal segmentation after loss of  
272 Wnt signaling was irreversible, indicating the interruption of an essential autoregulatory loop of Wnt  
273 signaling alone or autoregulatory interactions between Wnt-caudal. We were not able to test *Tc-*  
274 *caudal* because parental RNAi leads to sterility prohibiting the collection of the high number of  
275 embryos required for these type of experiments.

### 276 **Segmentation breakdown after primary pair rule gene knock-down is reversible**

277 Downstream of the Wnt signaling- and *Tc-caudal* gradients, three primary pair-rule genes (pPRG)  
278 are essential for segmentation. *Tc-even-skipped (Tc-eve)*, *Tc-runt (Tc-run)*, and *Tc-odd-skipped (Tc-*  
279 *odd)* form a regulatory circuit leading to their oscillating expression in the SAZ. The resulting  
280 overlapping stripes provide spatial information for segmentation (10, 11; models discussed in 20, 1,

281 8, 4). RNAi knock-down of each pPRG leads to the breakdown of blastodermal and posterior  
282 segmentation (8). It was suggested that their mutual regulation represented a regulatory circuit,  
283 which had to be started at the blastoderm stage and stopped after elongation was completed (8).  
284 Later, it was suggested that their oscillations were under the control of a speed regulation gradient  
285 provided by ongoing expression of *Tc-caudal* in the SAZ (10, 19, 20). In a scenario with a fully  
286 autonomous regulatory circuit, the breakdown would be irreversible while in the model involving a  
287 speed regulation gradient, re-establishment of segmentation under the control of the unaffected  
288 upstream Wnt/*Tc-caudal* function was likely. As previously shown, *Tc-eve* RNAi resulted in cuticles  
289 that retained only labrum (Lr) and antennae (Ant) in both the hsVSR line and the wild type controls  
290 (Fig. 3A and C, “hs<sup>neg</sup>”). In contrast to previous results, we noted a pair of tracheal openings (90%, not  
291 shown). Expression of the VSR during the early time window (10-13h) did rescue both some anterior  
292 and abdominal segments (Fig. 3C and D, green bars and boxes). Rescue of Md, Mx and one thoracic  
293 segment was observed (probably T1 as judged by the absence of a tracheal opening) (Fig. 3C). The  
294 median number of abdominal segments increased to four segments (with some cuticles showing as  
295 many as 6-7 abdominal segments, see Fig. 3D). The hs-treated wild type control did not show any  
296 rescue (Fig. 3C,D; red bars and boxes). VSR expression at 13-16h led to no significant rescue.  
297 However, some cuticles actually had more than the expected number of abdominal segments but  
298 this apparent rescue was counterbalanced by cuticles with additional loss of segments (Fig. 3D,  
299 “hsVSR, 13-16”). Likewise, the vw controls showed additional loss of segments upon heat-shock.  
300 Hence, it is possible that the negative effect of the hs-treatment counterbalanced a minor rescue  
301 effect at the late time window (see Fig. 1D). This experiment was repeated two more times, where  
302 one experiment showed similar results and one revealed no rescue effects (Fig. S3).

303 As previously published, parental *Tc-runt* RNAi resulted in cuticles that carried mandibles and up  
304 to one abdominal segment (Fig. 4A,C). Early VSR expression (10-13h) rescued some blastodermal  
305 segments (mx, T1, T2) and the abdominal segments to a median number of three (Fig. 4B, C and D).  
306 Some cuticles showed five or more rescued abdominal segments (Fig. 4D). Rescue at 13-16 h showed  
307 a similar albeit weaker rescue. Two more repetitions by the same researcher revealed no effect while  
308 a repetition by another researcher confirmed the rescue (Fig. S4).

309 *Tc-odd* parental RNAi knockdown resulted in cuticles missing all segments posterior to the  
310 maxillae (Mx) (Fig. 4E), as expected. Only the early window of VSR expression (10-13h) significantly  
311 rescued abdominal segments to a median number of three segments (Fig 4F,H). Of note, a small  
312 number of cuticles showed up to 8 rescued segments. Again, two more repetitions gave unclear  
313 results while the repetition by another scientist showed a clear effect (see Fig S4).

314 In summary, for all three pPRG we found that segmentation could be re-initiated after a  
315 breakdown. Interestingly, the rescue for the primary pair rule genes was mostly restricted to the  
316 earliest time window of RNAi suppression while the rescue of the secondary PRG *Tc-prd* was found  
317 also for later time windows. Due to the complex setup, the strict timing requirements and likely  
318 variability in the heat-shocks of these experiments, not all experiments led to rescue. However, for  
319 each pPRG we found rescue of segmentation in at least two independent replicates and the  
320 combination of posterior rescue with anterior deletions is a very specific and unique phenotype.  
321 Together with the expression analysis presented below, this makes us confident that the results are  
322 valid.

### 323 **Gene expression patterns reflect early rescue by hsVSR treatment**

324 Our results on the cuticle level indicated that the segmentation machinery could be re-established  
325 after breakdown. However, cuticle is secreted at the end of embryonic development (which takes



326 roughly 72h at 32°C) while segmentation takes place during the first 24 h. Hence, late compensatory  
327 effects could blur the early direct effects of the rescue. Therefore, we wanted to observe the re-  
328 establishment of the segmentation clock more directly after VSR expression. *Tc-eve* RNAi was chosen  
329 for that purpose because it had shown the most robust response in our previous experiments. We  
330 repeated the experiment and checked a portion of the embryos for successful rescue on the cuticle  
331 level to confirm successful performance of the experiment. The other embryos were fixed some  
332 hours after the hsVSR treatment to visualize the expression of the three pPRGs and the segmental  
333 marker *Tc-wingless* (*Tc-wg*) (see Fig. 1F for experimental outline). Of note, we had to fix wt and heat-  
334 shocked embryos at different times in order to obtain comparable stages because heatshock leads to  
335 a delay in development for which we had to compensate. Hence, we first carefully staged *Tc-wg*  
336 patterns (Fig. S5) and optimized the timing of fixation such that animals from the different  
337 experimental groups (with and without heat-shock, with and without *Tc-eve* RNAi) would be at  
338 comparable stages (Fig. S6).

339 Parental RNAi of *Tc-eve* in wildtype resulted in the almost complete loss of segmentation  
340 irrespective of heat-shock treatment. Instead of segmental stripes, a broad *Tc-wg* domain was  
341 observed in the trunk (Fig. 5Aiv and Biv). *Tc-eve* formed one broad domain without stripes (Fig. 5Aiv  
342 and Biv), which did not overlap with the *Tc-wg* pattern. Likewise, *Tc-odd* was expressed in one  
343 domain while *Tc-runt* showed two abnormal stripes (Fig. 5Aii and Bii – compare to wildtype patterns  
344 in C). *Tc-eve* RNAi in the hs-VSR line without heat-shock led to essentially the same patterns  
345 (compare Fig 5C to A and B). However, upon hsVSR treatment, the expression of *Tc-wg* reflected the  
346 formation of stripes (Fig. 5 Div – compare to Aiv, Biv and Civ). In addition, all three pPRGs re-gained  
347 some degree of striped expression (Fig. 5D). To quantify this rescue, we counted the number of  
348 stripes of the pPRGs and *Tc-wg* in a number of embryos. Indeed, we found a highly significant  
349 increase of stripes after rescue for *Tc-wg* while the low number of pPRG stripes visible at the same  
350 time (maximum three) led to a low level of statistical significance (compare the values after heat-  
351 shock in Fig. 6A). In an alternative approach, we sorted the stained germband embryos into three  
352 classes based on their overall expression patterns: “Close to WT” (WT), “intermediate” (+/-) and “all  
353 stripes lost” (-). (Fig. 6B; see Fig. S7 for documentation of pictures and our embryo classification). For  
354 all three pPRGs, the highest portion of WT and intermediate phenotypes was found in the hsVSR  
355 treated batches (Fig. 6B hs-VSR, 10-13 h). For *Tc-eve*, the difference was statistically significant while  
356 for the other genes, the p-value was low but did not reach significance levels (Fig. 6B).

### 357 ***Self-repressing function of Tc-eve revealed by qPCR***

358 Finally, we sought to check for up- and downregulation of the involved genes by qPCR. We  
359 confirmed strong increase of VSR expression upon heat-shock (Fig. S8). Expression of *Tc-odd* and *Tc-*  
360 *runt* were not much altered in line with our expression analysis, where both genes remain expressed  
361 but lose their striped patterns (Fig. 5). Surprisingly, RNAi targeting *Tc-eve* did not reduce the *Tc-eve*  
362 transcript level. However, when testing for intronic sequences in *Tc-eve* RNAi embryos, we found a  
363 strong upregulation of expression (Fig. S8). Apparently, the loss of *Tc-eve* function leads to  
364 upregulation of its expression, blurring the qPCR results. This result is strong indication for a so far  
365 ignored self-repressing function of *Tc-eve* during segmentation. In line with this assumption, *Tc-eve*  
366 RNAi embryos that were rescued with hsVSR returned to normal intronic expression levels (Fig. S8).

## 367 Discussion

### 368 ***Gaining temporal control on RNAi by hsVSR – new possibilities and restrictions***

369 With this work we expand the toolkit of *T. castaneum* with a system that allows to block RNAi  
370 with temporal control. The tool might be useful to distinguish between early and late function of  
371 genes (shown in this study) or for the analysis of other temporal processes such as the sequential  
372 expression of neuroblast timing factors. Further, it could help to overcome technical problems with  
373 parental RNAi of genes that lead to sterility. To that end, blocking RNAi in the mother but not the  
374 offspring could reduce the sterility issue. We note that the heat-shock experiments were sensitive to  
375 changes in the procedure and had to be optimized carefully. Importantly, we show that the negative  
376 effect of a heat-shock treatment on developmental processes has to be controlled for. Given the  
377 documented function of CrPV1A in flies and beetles, it seems likely that it will be active in other  
378 insects, too, opening the possibility to transfer that technique to other species. Theoretically, the  
379 CrPV1A VSR could also be used for tools that allow spatial control of RNAi. However, from several  
380 unsuccessful attempts in that direction we conclude that strong ubiquitous expression of the CrPV1A  
381 probably has negative effects on viability. This may interfere with the establishment and  
382 maintenance of lines with strong ubiquitous VSR effect (Hakeemi, in preparation). Using the  
383 Gal4/UAS binary expression system for establishing spatial control may be a viable alternative (39).

384 Of course, it would have been valuable to study the late interactions of the segmentation  
385 machinery such as taking out a component during ongoing segmentation. We thought this could be  
386 done by dsRNA injection into embryos at different stages. Indeed, we tried several injection time  
387 series using *Tc-prd* as target gene. In all batches analyzed, the RNAi knockdown was similar in  
388 strength for anterior and posterior segments (i.e. gnathal vs. abdominal segments). The later we  
389 injected, the weaker was the phenotype for all body regions alike. Apparently the build up of the  
390 RNAi response takes longer than the segmentation process, which takes around 15 hours at (32°C)  
391 starting at the differentiated blastoderm stage. This would explain why all segments were affected by  
392 the same degree of RNAi knock-down. Other experimental approaches would be needed for taking  
393 out a component during elongation.

394

### 395 ***Segmentation relies on both, robust and interruptible regulatory feedback loops***

396 Parental RNAi targeting a number of segmentation genes leads to the breakdown of  
397 segmentation and loss of all or most trunk segments. This breakdown phenotype was observed after  
398 the knock-down of several classes of genes such as the gap-gene orthologs *Tc-hunchback*, *Tc-Krüppel*  
399 and *Tc-giant* (26–28), the primary pair rule genes *Tc-eve*, *Tc-odd* and *Tc-runt* (8), the posterior marker  
400 *Tc-caudal* (43) and components of the Wnt signaling pathway (42, 45) and torso signaling  
401 components (41). In all these cases, the phenotypes were experimentally generated by a continuous  
402 knock-down of the respective gene function throughout development by an ongoing RNAi response.  
403 Hence, two alternative explanations for the breakdown phenotypes remained possible: On one hand,  
404 they could reflect an inherent instability of the system that irreversibly breaks down after the  
405 removal of an essential component – the continuous knock-down would not have been required for  
406 the loss of most posterior segments. Alternatively, the system could be robust and able to re-initiate  
407 but that the continuous depletion of an essential component led to the continued interference with  
408 segmentation leading to the apparent breakdown phenotype. The results presented here indicate  
409 that the gene regulatory system of segmentation actually contains both, a robust down-stream

410 component able to re-initiate and a less robust upstream component that can breakdown  
411 irreversibly.

412 Recent elaborations of the clock and speed regulation gradient model contain two genetic  
413 feedback loops. First, a positive feedback loop between Wnt signaling and *Tc-cad* expression, which  
414 maintains their continued expression in the SAZ (1, 4). The resulting graded activity represents the  
415 speed regulation gradient, which influences the velocity of the clock (20). In our experiments,  
416 segmentation did not re-establish after the knock-down of two Wnt components although their  
417 expression could have resumed after blocking RNAi by the hsVSR. This indicates that the Wnt/cad  
418 feedback loop had irreversibly broken down. Interestingly, posterior Wnt signaling is self-activating at  
419 least at early stages (17). This auto regulatory loop would theoretically be sufficient to maintain Wnt  
420 activity at the posterior and the design of such a simple positive feedback loop would readily explain  
421 an irreversible breakdown. However, a simple one-component self-activating system would be prone  
422 to activation at erroneous sites – especially considering the many places of Wnt activity throughout  
423 development. Therefore, *Tc-cad* seems to be an essential component of the upstream feedback-loop  
424 maintaining the SAZ. This additional component would confer a robust localization of the SAZ at the  
425 posterior. Indeed, there is evidence that *Tc-cad* and Wnt signaling depend on each other in *T.*  
426 *castaneum* (15, 17, 19). Hence, we predict that in similar hsVSR experiments, *Tc-cad* RNAi would lead  
427 to an irreversible knock-down as well. Unfortunately, we were not able to test this hypothesis  
428 because strong parental RNAi targeting *Tc-cad* resulted in sterility.

429 The second regulatory feedback loop in the system is the primary PRG gene circuit (8). In the  
430 framework of the clock and speed regulation gradient model, this circuit is thought to be the  
431 molecular realization of the cell-autonomous clock (19). We found that this feedback loop readily re-  
432 established itself after the knock-down of the components was blocked by hsVSR treatment. This was  
433 observed for all three components. Hence, the components of that loop appear to be connected in a  
434 way that allows for a re-initiation of the clock whenever all components are functional (i.e. all three  
435 pPRGs and the upstream Wnt/cad gradient).

436 It had remained a possibility that an as yet unknown factor expressed in the SAZ was acting  
437 upstream of the Wnt/cad feedback loop in order to maintain the SAZ. Our data argues against such a  
438 hypothetical factor because the interruption of Wnt signaling led to an irreversible breakdown of the  
439 system. If the Wnt/cad system was activated by an upstream factor, one would have expected re-  
440 initiation. In line with this hypothesis, the genome wide iBeetle RNAi screen failed to reveal such a  
441 component in *T. castaneum* (47, 48).

442

### 443 ***Ensuring specificity and robustness of the segmentation***

444 The different levels of robustness of the two gene regulatory loops to external manipulations  
445 reflect the need for on one hand initiating segmentation only once and at one specific location and  
446 on the other hand ensuring the need for robustness of the ongoing segmentation towards external  
447 perturbations. Indeed, the regulatory interactions initiating segmentation seem to be designed in a  
448 way that establishment of a secondary ectopic SAZ is unlikely. At least three different signaling  
449 events need to coincide: The asymmetric activity of canonical Wnt signaling at the posterior is the  
450 first zygotic readout of maternally driven axis formation and therefore an excellent trigger for  
451 locating the SAZ posteriorly (15, 49). *Tc-tor* signaling restricts activation to very early stages because  
452 torso signaling is active in the SAZ only early on (41, 50). *Tc-cad* expression is thought to be regulated  
453 by the initial Wnt asymmetry – still, it could confer additional robustness to the spatial specificity of  
454 SAZ induction (51). Indeed, the initiation system seems to be extremely stable as we are not aware of

455 reports of split posterior trunks in insect embryos. It would be worth testing, whether these three  
456 components are indeed sufficient to initiate a SAZ by the joint ectopic activation of these three  
457 components making use of the transgenic and genome editing tool kit of *T. castaneum* (52).

458 In contrast to the initiation, which should happen only once and only at one position, the ongoing  
459 segmentation process should be robust against external perturbations. Hence, our finding that the  
460 regulatory setup of the clock components allow for re-initiation after external perturbation fit that  
461 expectation. Indeed, the irregular stripes re-initiating after rescue in early embryos (Fig. 5 E) lead to  
462 remarkable well-developed segments in the cuticle. Further, when a second SAZ is specified early on  
463 either by genetic interference or by classic embryonic manipulations in other insects, a perfectly well  
464 developed mirror image abdomen can develop (15, 53–56). This indicates that indeed, after  
465 initiation, the segmentation process is robust and autonomous.

466  
467

## 468 **Material and Methods**

469

### 470 ***Strains and husbandry***

471

472 *Tribolium castaneum* (HERBST) beetles were reared using standard conditions and methods  
473 (52). During experiments, beetles (embryos/larvae) were kept at 32°C and 40% RH while  
474 general stock keeping was done at 28°C and 40% RH. RNAi inhibition experiments were  
475 performed in the transgenic line containing the RNAi inhibitor CrPV1A from the Cricket  
476 Paralysis Virus under the control of the endogenous *Tribolium* heat shock promoter (40) and  
477 the 3xP3DsRed (eye marker) integrated into the genome using piggyback vector (57) in  
478 *Tribolium* line vermilion<sup>white</sup>. Non-transgenic vermilion<sup>white</sup> beetles were used for negative  
479 controls.

### 480 ***RNAi and heat-shock treatment***

481 Parental RNAi was performed according to established methods (5, 58). Templates were  
482 prepared by PCR with T7 overhanging-primers from plasmid templates containing varying  
483 lengths of coding and/or regulatory mRNA sequence (*Tc-even-skipped* ~1400 bp, *Tc-odd-*  
484 *skipped* ~380 bp, *Tc-paired* ~540 bp, *Tc-arrow* ~1800 bp, *Tc-Wnt8/D* ~500 bp, *Tc-wntless* ~600  
485 bp). DsRNA was produced using MEGAscript T7 Transcription Kit (Life Technologies). The  
486 concentration of injected dsRNA for parental RNAi was 1000 ng/μl (*Tc-even-skipped*), 500  
487 ng/μl (*Tc-odd-skipped*, *Tc-paired*), or 100 ng/μl (*Tc-arrow*, *Tc-Wnt8/D*, *Tc-wntless*). Add NCBI  
488 accession number? *Tc-eve*: NM\_001039449.1; *Tc-odd*: XM\_008198532.2; *Tc-run*:  
489 XM\_964184.3; *Tc-wg*: NM\_001114350

490 Embryos collected from dsRNA injected animals of either the hsVSR or wild type control  
491 (*vermillion*<sup>white</sup>) were collected and kept without flour at 32°C in small plastic fly culturing vials  
492 before the treatment. For the heat-shock, the eggs were transferred to a small (40ml) glass  
493 beaker with a flat bottom making sure that all embryos had direct contact with the bottom.  
494 Then, the beaker was put into a pre-heated 48°C waterbath. The beaker was covered with  
495 perforated aluminum foil. The bottom of the glass beaker was kept submerged for 10 min. To

496 ensure a controlled and quick termination of the heatshock, the beaker was put into a room  
497 temperature waterbath. After transferring the embryos back into the plastic vials, they were  
498 allowed to recover for two hours at 32°C, until they were heatshocked a second time for 10  
499 min at 48°C, following the same procedure. Thereafter, the embryos were kept at 32°C until  
500 fixation or cuticle preparation. We note that the results were sensitive even to minor changes  
501 of the procedure and each step needed to be optimized carefully.

### 502 ***Staining, and microscopy***

503 Embryo fixation and in-situ hybridisation were performed as described previously (59).  
504 Digoxigenin (DIG)-labeled riboprobes targeting *Tc-wg* (DIG RNA Labeling Kit, Roche), was  
505 detected by anti-DIG-AP antibodies (Roche) and visualized by NBT/BCIP staining. HCR staining  
506 was performed as published with small modification (kindly provided by Eric Clark and Olivia  
507 Tidswell prior publication) (60, 61). HCR probes for *Tc-eve* were purchased from Molecular  
508 Technologies while HCR probes for all other genes were purchased from Molecular  
509 Instruments. Binding sequences are available from vendors at request due to intellectual  
510 properties restrictions. Cuticles of L1 larvae were analyzed and documented using either a  
511 Zeiss AxioPlan 2 (10x air objective) with ImagePro 6 or a Leica SP5 inverted cLSM (10x air  
512 objective) with Leica LAS-X software, utilizing the cuticle's autofluorescence. HCR stainings  
513 were documented using a Leica SP8 confocal laser-scanning microscope (20x objectives with  
514 100% glycerol as immersion medium) and the Leica LAS-X software (v 3.5.2). In-situ  
515 hybridization was documented using Zeiss AxioPlan 2 or Zeiss AxioScope.

### 516 ***qPCR***

517 RNA from whole embryos was extracted using the Quick-RNA Tissue/Insect Kit (Zymo  
518 Research) with DNase on-column digest (DNaseI Set, Zymo Research). cDNA was synthesized  
519 using the MAXIMA First Strand cDNA Synthesis Kit for RT-qPCR (Thermo Fisher Scientific)  
520 according to manufacturer's instructions. qPCRs were performed using the CFX96 Real-Time  
521 PCR System (Bio-Rad Laboratories) with 5x HOT FIREPol® EvaGreen® qPCR Mix Plus (ROX)  
522 Master mix (Solis Biodyne). Reference genes were identified using RefFinder (62). qPCR data  
523 analysis was done in the CFX Manager 3.1 (Bio-Rad Laboratories) and pyQPCR with the delta-  
524 delta-Ct method (63).

### 525 ***Statistical analysis***

526 Comparisons of abdominal segment numbers in cuticles and comparisons of number of  
527 expression stripes in germbands were tested using unpaired, two-sided Mann–Whitney U  
528 tests for independent samples. All measured data points were included in the calculations and  
529 were not checked for outliers beforehand. Outliers were determined for the plots using the R  
530 package *ggplot2*, considering data above 1.5 \*IQR of the 75th percentile or below 1.5 \*IQR of  
531 the 25th percentile as outliers, which are indicated in in the respective plots in red.  
532 Comparisons of the number of stripes in germbands were done using the Pearson's Chi-  
533 squared Test for Count Data with simulated p-values by Monte Carlo simulations (B=1000). All  
534 graphs and statistical calculations were performed using R (v3.5.2; R Core Team, 2018) and

535 RStudio (v1.1.x; RStudio Team, 2015) with the following packages: dplyr, ggplot2, ggpubr,  
536 ggsignif, patchwork, readxl, reshape2.

## 537 Acknowledgements

538 We thank Michalis Averof and Martin Klingler for valuable discussions and Eric Clark, Olivia  
539 Tidswell and Michael Akam for sharing protocols prior publication. This work was funded by  
540 Deutsche Forschungsgemeinschaft ANR-DFG joint programme (together with M. Averof) BU1443/14-  
541 1 and the Deutsche Forschungsgemeinschaft programme for researchers in danger BU1443/14-1ad.

542

## References

- 543 1. E. Clark, A. D. Peel, M. Akam, Arthropod segmentation. *Development (Cambridge,*  
544 *England)* **146**, dev170480 (2019).
- 545 2. G. K. Davis, N. H. Patel, SHORT, LONG, AND BEYOND: Molecular and Embryological  
546 Approaches to Insect Segmentation. *Annual Review of Entomology* **47**, 669–699 (2002).
- 547 3. D. Tautz, Segmentation. *Dev Cell* **7**, 301–12 (2004).
- 548 4. M. Diaz-Cuadros, O. Pourquié, E. El-Sherif, Patterning with clocks and genetic  
549 cascades: Segmentation and regionalization of vertebrate versus insect body plans. *PLoS Genet*  
550 **17**, e1009812 (2021).
- 551 5. G. Bucher, J. Scholten, M. Klingler, Parental RNAi in Tribolium (Coleoptera). *Current*  
552 *Biology* **12**, R85–R86 (2002).
- 553 6. C. Nüsslein-Volhard, E. Wieschaus, Mutations affecting segment number and polarity  
554 in Drosophila. *Nature* **287**, 795–801 (1980).
- 555 7. D. St Johnston, C. Nüsslein-Volhard, The origin of pattern and polarity in the  
556 Drosophila embryo. *Cell* **68**, 201–19 (1992).
- 557 8. C. P. Choe, S. C. Miller, S. J. Brown, A pair-rule gene circuit defines segments  
558 sequentially in the short-germ insect Tribolium castaneum. *Proceedings of the National*  
559 *Academy of Sciences of the United States of America* **103**, 6560–6564 (2006).
- 560 9. E. Clark, Dynamic patterning by the Drosophila pair-rule network reconciles long-  
561 germ and short-germ segmentation. *PLoS Biol* **15**, e2002439 (2017).
- 562 10. E. El-Sherif, M. Averof, S. J. Brown, A segmentation clock operating in blastoderm and  
563 germband stages of Tribolium development. *Development (Cambridge, England)* **139**, 4341–  
564 4346 (2012).
- 565 11. A. F. Sarrazin, A. D. Peel, M. Averof, A segmentation clock with two-segment  
566 periodicity in insects. *Science* **336**, 338–341 (2012).
- 567 12. A. C. Oates, L. G. Morelli, S. Ares, Patterning embryos with oscillations: structure,  
568 function and dynamics of the vertebrate segmentation clock. *Development* **139**, 625–639  
569 (2012).
- 570 13. I. Palmeirim, D. Henrique, D. Ish-Horowicz, O. Pourquié, Avian hairy gene expression  
571 identifies a molecular clock linked to vertebrate segmentation and somitogenesis. *Cell* **91**, 639–  
572 648 (1997).
- 573 14. H. Rudolf, C. Zellner, E. El-Sherif, Speeding up anterior-posterior patterning of insects  
574 by differential initialization of the gap gene cascade. *Dev Biol* **460**, 20–31 (2020).
- 575 15. S. Ansari, *et al.*, Double abdomen in a short-germ insect: Zygotic control of axis  
576 formation revealed in the beetle Tribolium castaneum. *Proc. Natl. Acad. Sci. U.S.A.* **115**, 1819–  
577 1824 (2018).
- 578 16. A. Beermann, R. Pruhs, R. Lutz, R. Schroder, A context-dependent combination of  
579 Wnt receptors controls axis elongation and leg development in a short germ insect.  
580 *Development* **138**, 2793–805 (2011).
- 581 17. G. Oberhofer, D. Grossmann, J. L. Siemanowski, T. Beissbarth, G. Bucher, Wnt/ $\beta$ -  
582 catenin signaling integrates patterning and metabolism of the insect growth zone.  
583 *Development*, dev.112797 (2014).
- 584 18. A. Schönauer, *et al.*, The Wnt and Delta-Notch signalling pathways interact to direct  
585 pair-rule gene expression via caudal during segment addition in the spider Parasteatoda  
586 tepidariorum. *Development* **143**, 2455–2463 (2016).
- 587 19. E. El-Sherif, X. Zhu, J. Fu, S. J. Brown, Caudal Regulates the Spatiotemporal Dynamics  
588 of Pair-Rule Waves in Tribolium. *PLOS Genetics* **10**, e1004677 (2014).
- 589 20. X. Zhu, *et al.*, Speed regulation of genetic cascades allows for evolvability in the body  
590 plan specification of insects. *Proceedings of the National Academy of Sciences of the United*  
591 *States of America* **128**, 201702478-E8655 (2017).
- 592 21. E. Clark, A. D. Peel, Evidence for the temporal regulation of insect segmentation by a  
593 conserved sequence of transcription factors. *Development* **145**, dev155580, dev.155580 (2018).

- 594 22. M. Aranda, H. Marques-Souza, T. Bayer, D. Tautz, The role of the segmentation gene  
595 hairy in *Tribolium*. *Dev. Genes Evol.* **218**, 465–477 (2008).
- 596 23. C. P. Choe, S. J. Brown, Evolutionary flexibility of pair-rule patterning revealed by  
597 functional analysis of secondary pair-rule genes, paired and sloppy-paired in the short-germ  
598 insect, *Tribolium castaneum*. *Developmental biology* **302**, 281–294 (2007).
- 599 24. F. Maderspacher, G. Bucher, M. Klingler, Pair-rule and gap gene mutants in the flour  
600 beetle *Tribolium castaneum*. *Dev Genes Evol* **208**, 558–68 (1998).
- 601 25. A. Boos, J. Distler, H. Rudolf, M. Klingler, E. El-Sherif, A re-inducible gap gene cascade  
602 patterns the anterior-posterior axis of insects in a threshold-free fashion. *Elife* **7**, e41208  
603 (2018).
- 604 26. G. Bucher, M. Klingler, Divergent segmentation mechanism in the short germ insect  
605 *Tribolium* revealed by giant expression and function. *Development* **131**, 1729–40 (2004).
- 606 27. A. C. Cerny, G. Bucher, R. Schroder, M. Klingler, Breakdown of abdominal patterning  
607 in the *Tribolium* Kruppel mutant jaws. *Development (Cambridge, England)* **132**, 5353–63 (2005).
- 608 28. H. Marques-Souza, M. Aranda, D. Tautz, Delimiting the conserved features of  
609 hunchback function for the trunk organization of insects. *Development (Cambridge, England)*  
610 **135**, 881–8 (2008).
- 611 29. R. Aliyari, *et al.*, Mechanism of induction and suppression of antiviral immunity  
612 directed by virus-derived small RNAs in *Drosophila*. *Cell Host Microbe* **4**, 387–397 (2008).
- 613 30. E. H. Bayne, D. V. Rakitina, S. Y. Morozov, D. C. Baulcombe, Cell-to-cell movement of  
614 potato potexvirus X is dependent on suppression of RNA silencing. *Plant J* **44**, 471–482 (2005).
- 615 31. J. A. Chao, *et al.*, Dual modes of RNA-silencing suppression by Flock House virus  
616 protein B2. *Nat Struct Mol Biol* **12**, 952–957 (2005).
- 617 32. H. Jin, J.-K. Zhu, A viral suppressor protein inhibits host RNA silencing by hooking up  
618 with Argonautes. *Genes Dev* **24**, 853–856 (2010).
- 619 33. A. Nayak, *et al.*, Cricket paralysis virus antagonizes Argonaute 2 to modulate antiviral  
620 defense in *Drosophila*. *Nat Struct Mol Biol* **17**, 547–554 (2010).
- 621 34. J. T. van Mierlo, *et al.*, Convergent evolution of argonaute-2 slicer antagonism in two  
622 distinct insect RNA viruses. *PLoS Pathog* **8**, e1002872 (2012).
- 623 35. R. P. van Rij, *et al.*, The RNA silencing endonuclease Argonaute 2 mediates specific  
624 antiviral immunity in *Drosophila melanogaster*. *Genes Dev* **20**, 2985–2995 (2006).
- 625 36. O. Voinnet, C. Lederer, D. C. Baulcombe, A viral movement protein prevents spread  
626 of the gene silencing signal in *Nicotiana benthamiana*. *Cell* **103**, 157–167 (2000).
- 627 37. G. Meister, T. Tuschl, Mechanisms of gene silencing by double-stranded RNA. *Nature*  
628 **431**, 343–9 (2004).
- 629 38. C. B. Phelps, A. H. Brand, Ectopic gene expression in *Drosophila* using GAL4 system.  
630 *Methods* **14**, 367–79 (1998).
- 631 39. J. B. Schinko, *et al.*, Functionality of the GAL4/UAS system in *Tribolium* requires the  
632 use of endogenous core promoters. *BMC Dev Biol* **10**, 53 (2010).
- 633 40. J. Schinko, K. Hillebrand, G. Bucher, Heat shock-mediated misexpression of genes in  
634 the beetle *Tribolium castaneum*. *Dev Genes Evol.* **Dev Genes Evol.**, 287–98 (2012).
- 635 41. M. Schoppmeier, R. Schröder, Maternal torso signaling controls body axis elongation  
636 in a short germ insect. *Current Biology* **15**, 2131–2136 (2005).
- 637 42. R. Bolognesi, L. Farzana, T. D. Fischer, S. J. Brown, Multiple wnt genes are required for  
638 segmentation in the short-germ embryo of *tribolium castaneum*. *Current biology : CB* **18**, 1624–  
639 1629 (2008).
- 640 43. T. Copf, R. Schroder, M. Averof, Ancestral role of caudal genes in axis elongation and  
641 segmentation. *Proceedings of the National Academy of Sciences of the United States of America*  
642 **101**, 17711–5 (2004).
- 643 44. E. V. W. Setton, P. P. Sharma, A conserved role for arrow in posterior axis patterning  
644 across Arthropoda. *Dev Biol* **475**, 91–105 (2021).



- 645 45. R. Bolognesi, T. D. Fischer, S. J. Brown, Loss of Tc-arrow and canonical Wnt signaling  
646 alters posterior morphology and pair-rule gene expression in the short-germ insect, *Tribolium*  
647 *castaneum*. *Development Genes and Evolution* **219**, 369–375 (2009).
- 648 46. R. Bolognesi, *et al.*, *Tribolium* Wnts: evidence for a larger repertoire in insects with  
649 overlapping expression patterns that suggest multiple redundant functions in embryogenesis.  
650 *Development genes and evolution* **218**, 193–202 (2008).
- 651 47. M. S. Hakeemi, *et al.*, Screens in fly and beetle reveal vastly divergent gene sets  
652 required for developmental processes. *BMC Biology* **20**, 38 (2022).
- 653 48. C. Schmitt-Engel, *et al.*, The iBeetle large-scale RNAi screen reveals gene functions for  
654 insect development and physiology. *Nature Communications* **6**, 7822 (2015).
- 655 49. J. Fu, *et al.*, Asymmetrically expressed axin required for anterior development in  
656 *Tribolium*. *Proc. Natl. Acad. Sci. U.S.A.* **109**, 7782–7786 (2012).
- 657 50. R. Schröder, C. Eckert, C. Wolff, D. Tautz, Conserved and divergent aspects of  
658 terminal patterning in the beetle *Tribolium castaneum*. *Proc. Natl. Acad. Sci. U.S.A.* **97**, 6591–  
659 6596 (2000).
- 660 51. C. Schulz, R. Schroder, B. Hausdorf, C. Wolff, D. Tautz, A caudal homologue in the  
661 short germ band beetle *Tribolium* shows similarities to both, the *Drosophila* and the vertebrate  
662 caudal expression patterns. *Development genes and evolution* **208**, 283–9 (1998).
- 663 52. M. Klingler, G. Bucher, The red flour beetle *T. castaneum*: elaborate genetic toolkit  
664 and unbiased large scale RNAi screening to study insect biology and evolution. *Evodevo* **13**, 14  
665 (2022).
- 666 53. K. Sander, [Reversal of the germ band polarity in egg fragments of *Euscelis*  
667 (*Cicadina*)]. *Experientia* **17**, 179–180 (1961).
- 668 54. K. Sander, “Specification of the basic body pattern in insect embryogenesis” in  
669 *Advances in Insect Physiology*, J. E. Treherne, M. J. Berridge, V. B. Wigglesworth, Eds. (Academic  
670 Press, 1976), pp. 125–238.
- 671 55. J. Klomp, *et al.*, Embryo development. A cysteine-clamp gene drives embryo polarity  
672 in the midge *Chironomus*. *Science (New York, N.Y.)* **348**, 1040–1042 (2015).
- 673 56. Y. Yoon, *et al.*, Embryo polarity in moth flies and mosquitoes relies on distinct old  
674 genes with localized transcript isoforms. *Elife* **8**, e46711 (2019).
- 675 57. A. J. Berghammer, M. Klingler, E. A. Wimmer, A universal marker for transgenic  
676 insects. *Nature* **402**, 370–1 (1999).
- 677 58. N. Posnien, *et al.*, RNAi in the red flour beetle (*Tribolium*). *Cold Spring Harb Protoc*  
678 **2009**, pdb.prot5256 (2009).
- 679 59. J. Schinko, N. Posnien, S. Kittelmann, N. Koniszewski, G. Bucher, Single and double  
680 whole-mount in situ hybridization in red flour beetle (*Tribolium*) embryos. *Cold Spring Harb*  
681 *Protoc* **2009**, pdb.prot5258 (2009).
- 682 60. H. M. T. Choi, *et al.*, Third-generation in situ hybridization chain reaction:  
683 multiplexed, quantitative, sensitive, versatile, robust. *Development* **145**, dev165753 (2018).
- 684 61. O. R. A. Tidswell, M. A. Benton, M. Akam, The neuroblast timer gene *nubbin* exhibits  
685 functional redundancy with gap genes to regulate segment identity in *Tribolium*. *Development*  
686 **148**, dev199719 (2021).
- 687 62. F. Xie, J. Wang, B. Zhang, RefFinder: a web-based tool for comprehensively analyzing  
688 and identifying reference genes. *Funct Integr Genomics* **23**, 125 (2023).
- 689 63. T. D. Schmittgen, K. J. Livak, Analyzing real-time PCR data by the comparative CT  
690 method. *Nat. Protocols* **3**, 1101–1108 (2008).
- 691  
692  
693

694 **Figures**

695 **Figure 1**

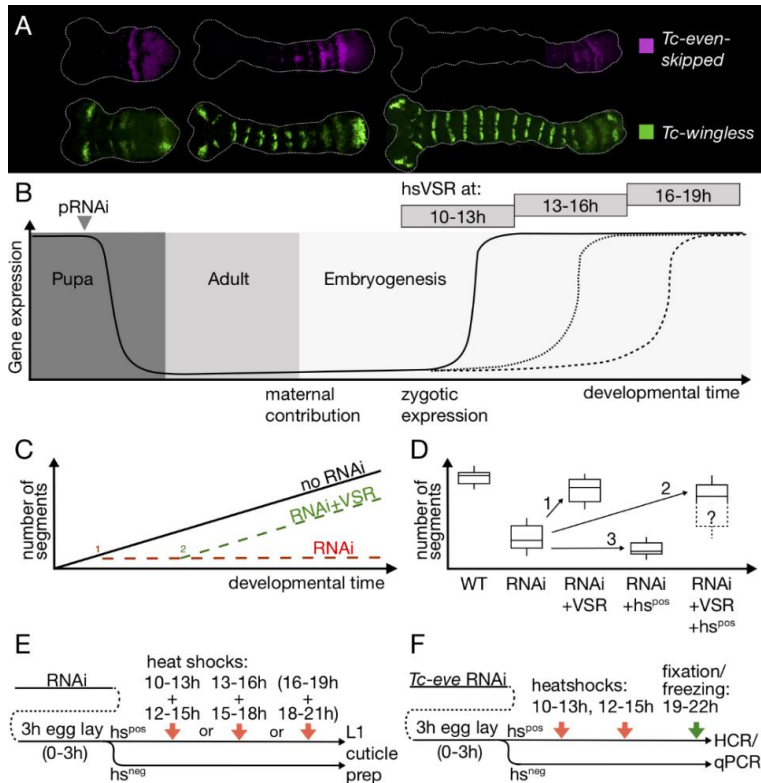

696  
697

698 **Figure 1 Overview on the experimental design**

699 A) *T. castaneum* embryos representing the stages used for blocking the RNAi (11.5, 14.5 and 17.5  
700 hours of development at 32°C). Shown is the expression of *Tc-eve* as an example for a pPRG and *Tc-  
701 wg* as marker for segment boundaries. B) Design of the rescue experiments. After parental RNAi  
702 (pRNAi), the level of expression drops (declining black line) and is low in the adult and at the  
703 beginning of embryogenesis of the offspring. Heat-shock mediated expression of the VSR blocks the  
704 RNAi effect after 10-13, 13-16 or 16-19 hours after egg laying, respectively. This allows gene  
705 expression to resume at different developmental stages (increasing black and dotted lines). C)  
706 Blocking the studied genes from the beginning of segmentation blocks the formation of any  
707 segments (red broken line). In case of heat-shock mediated rescue (timing: 2) segmentation resumes  
708 and forms some posterior segments (green broken line). Anterior segments should not be rescued.  
709 D) Several additive effects influence the final phenotype. RNAi lowers the number of segments due  
710 to the knock-down of an essential patterning gene. Rescue by the VSR increases the number of  
711 segments (arrow 1). However, heat-shock as such has negative influence on segmentation making  
712 phenotypes stronger (arrow 3). Hence, the final phenotype is a combination of rescue and heat-  
713 shock defects (arrow 2). E) Details of the procedure. After parental RNAi, eggs were collected for 3  
714 hours (0-3h) and treated with heat-shocks at different times of development in separate experiments:  
715 early (10-13h), intermediate (13-16 h) and late (16-19h). To maintain a high level of VSR expression,  
716 the heat-shock was repeated after 2 hours, respectively. The latest heat-shock showed minor effects  
717 and was not included in all experiments. Hs-negative (hs<sup>neg</sup>) siblings were used as controls. F) For  
718 staining the embryos and for the qPCR experiments, the treated embryos were fixed at a stage  
719 corresponding to 19-22h of development.

720

**Figure 2**

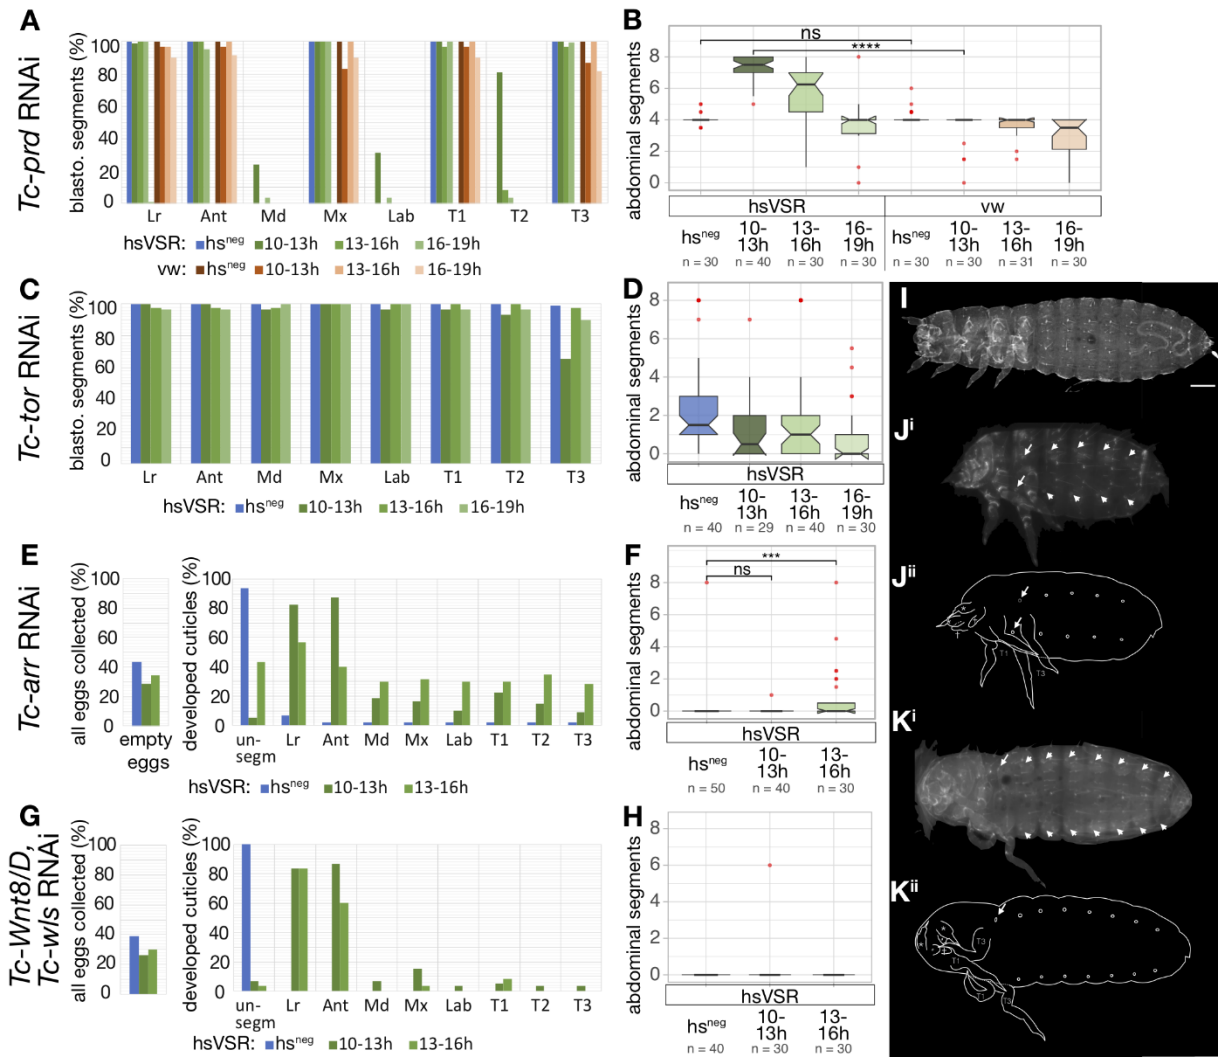

**Figure 2 Testing the hsVSR system and rescuing Wnt pathway components**

721

722

723

724

725

726

727

728

729

730

731

732

733

734

735

736

737

738

739

740

A) *Tc-paired* was used as positive control. The formation of anterior segments, which are built from the blastoderm fate-map, was scored after parental RNAi in the hsVSR line and heat-shock treatments after different times after egg laying (green bars). As negative controls, knock-down embryos of the hsVSR line without heat shock were analyzed (*hs<sup>neg</sup>*, blue bars) as well as wildtype animals (*vermillion<sup>white</sup>* strain, *vw*,) with RNAi and heat-shock (brownish bars). The presence of respective structures was quantified (Lr: labrum; Ant: antenna; Md: mandible; Mx: maxilla; Lab: labium; T1-3: thoracic segments). As expected, Md, Lab and T2 were mostly absent after RNAi. Only the early heatshock treatment in the hsVSR line (10-13h, dark green bars) showed clear rescue. In line with segmentation proceeding from anterior to posterior, the posterior segments were rescued more frequently. B) In the same animals, the number of abdominal segments was counted. In the wt RNAi control (right part, brownish boxes) the number of segments was reduced to four by RNAi as expected. The same was found for the non-heat-shock control of the hsVSR line (leftmost box, *hs<sup>neg</sup>*). Rescue was observed in the heat-shocked hsVSR animals. It was strongest for the earliest heat-shock (dark green box) while no rescue was observed in the latest (light green box). As unspecific side effect, the heat-shock treatment increased the severity of the RNAi treatment in both hsVSR and wt animals (reduced number of segments seen in right-most green and brownish boxes). C,D) The same treatments were performed for the negative control *Tc-tor*. No rescue was observed as expected for

741 this gene, which is active in the SAZ only at the initiation of segmentation. E-H) Knock-down of Wnt  
742 components is known to lead to empty-egg phenotypes, where embryogenesis stops before  
743 secretion of a cuticle. Therefore, we documented the portion of empty-egg phenotypes in all  
744 collected embryos (left panel in E and G) and analyzed the subset of embryos with cuticle both for  
745 the anterior morphological structures (right panel in E) and the number of abdominal segments (F).  
746 We found no rescue for Wnt8/wsl double RNAi (G,H). Some rescue of anterior structures and  
747 abdominal segments is observed for *Tc-arr* (E). However, we assign this effect to later functions of  
748 Wnt, which are independent from its SAZ function (see text for arguments). I,J) In *Tc-prd* RNAi  
749 cuticles, loss of anterior and abdominal segments is observed (compare J<sup>i</sup>, J<sup>ii</sup> to I). K) After heat-shock  
750 mediated rescue, the anterior defects are still observed (white arrows) while the posterior abdominal  
751 segments are rescued (white arrowheads mark segmental tracheal openings).

752 **Figure 3**

753

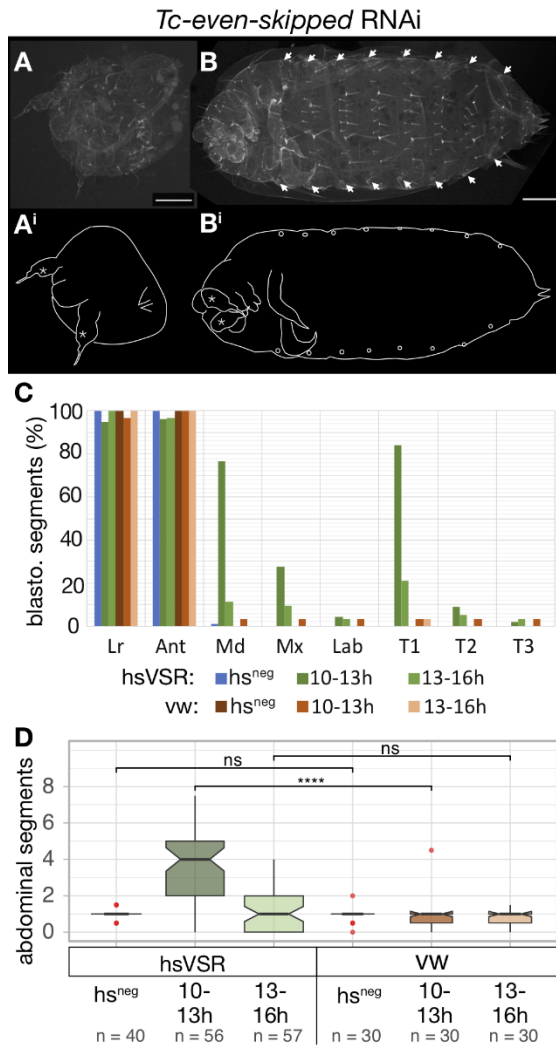

754

755

756 **Figure 3 Re-establishment of segmentation after rescue of *Tc-eve* expression**

757 A) *Tc-eve* RNAi leads to complete loss of trunk segmentation – only the labrum, the antennae and

758 the terminal urogomphi can still be discerned in the resulting cuticle balls. B) After hsVSR rescue,

759 some anterior segments in addition to some posterior abdominal segments are rescued – in the

760 specimen shown, all eight abdominal segments are discernable. C) Quantification of the effects for

761 the blastodermal segments reveals the highest degree of rescue for the early treatment. D) Likewise,

762 the most clear rescue of abdominal segments is found for the early rescue (dark green; 10-13h).

763 Labelling as in Fig. 2

764

765

766 **Figure 4**

767

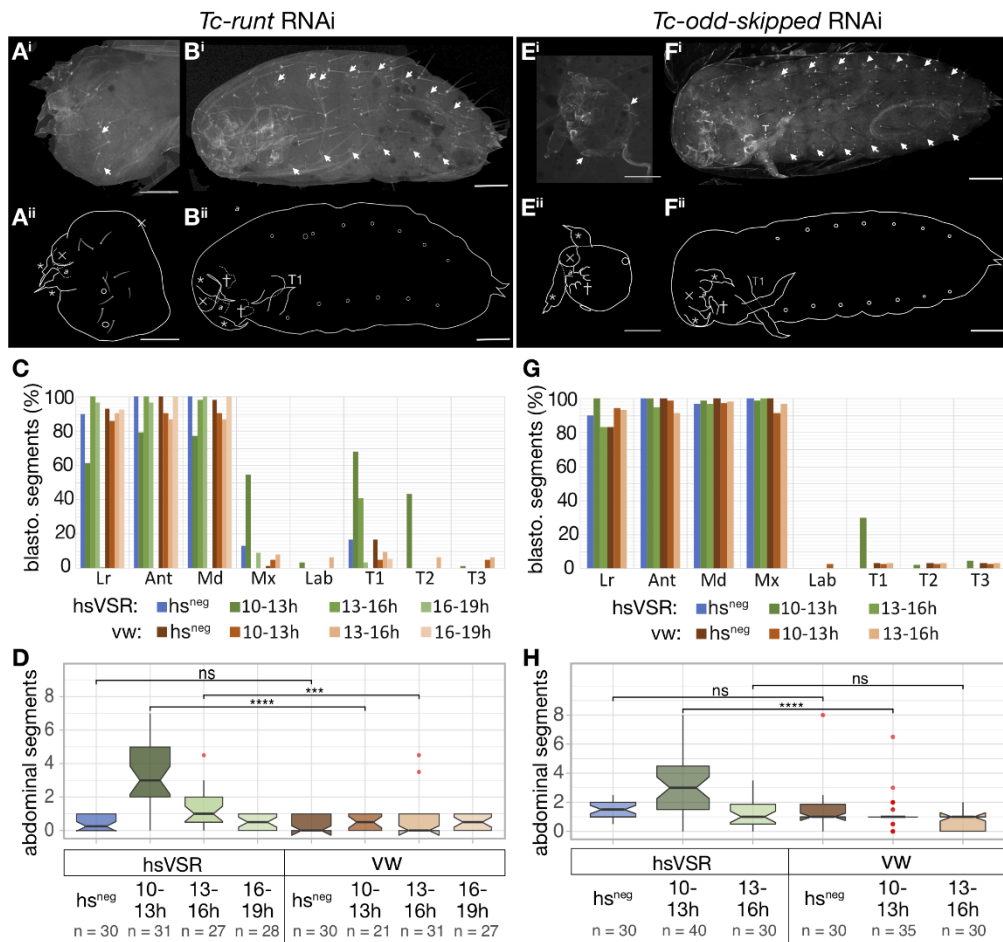

768

769

770 **Figure 4 Re-establishment of segmentation after rescue of *Tc-runt* and *Tc-odd* expression**

771 A,B) The *Tc-runt* RNAi phenotype (A) is rescued after the hs-treatment (B). C,D) Quantification of  
 772 the effects for the blastodermal (C) and the abdominal segments (D) reveals the highest degree of  
 773 rescue for the early treatment. E,F) Cuticles of *Tc-odd* RNAi phenotypes without (E) and with hsVSR  
 774 rescue (F). G,H) The rescue of anterior segments (G) and abdominal segments (H) was quantified. The  
 775 rescue of blastodermal segments is weaker in *Tc-runt* and *Tc-odd* compared to *Tc-eve*. Labelling as in  
 776 Fig. 2

777

778

779

780

**Figure 5**

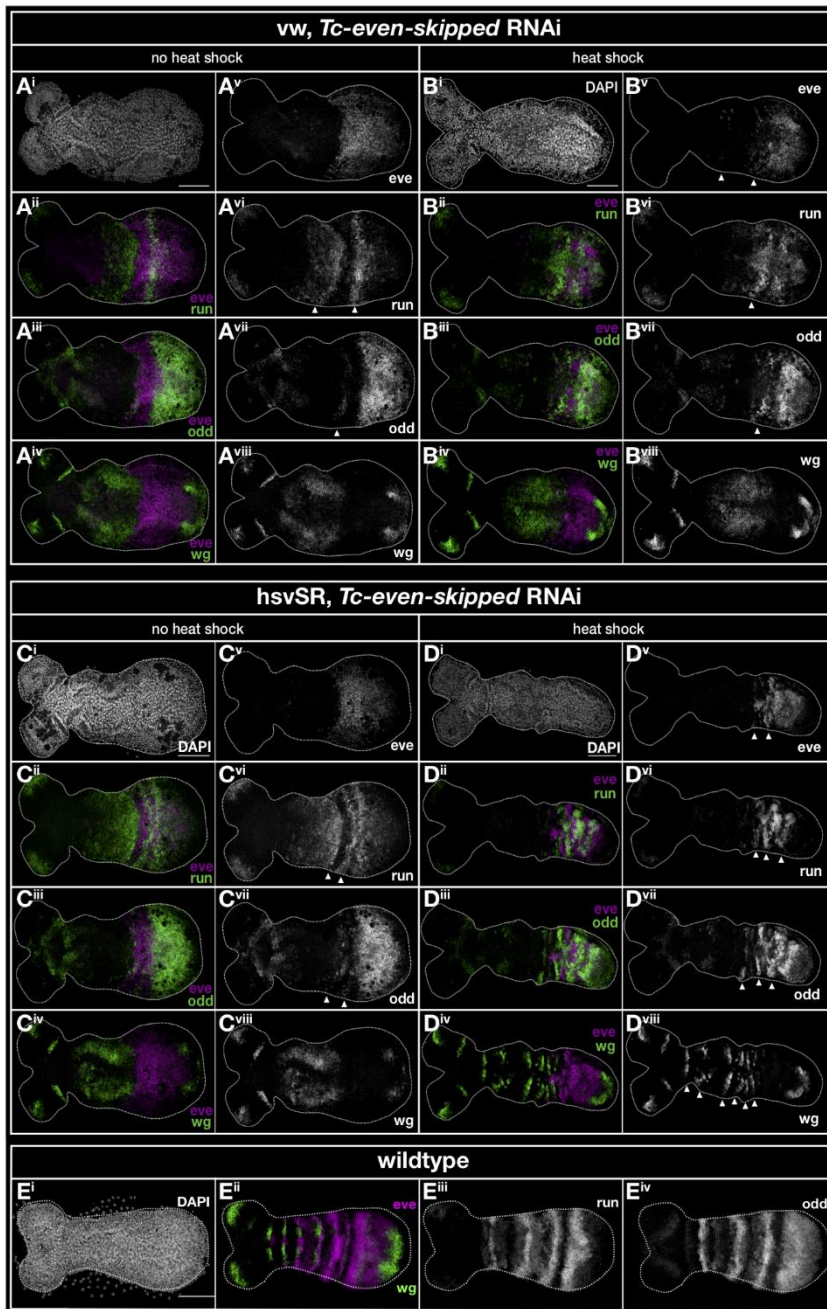

781

782

783 **Figure 5 Expression of pPRGs and Tc-wg in Tc-eve RNAi embryos with and without hsVSR rescue**

784 A,B) The expression of the primary pair rule genes and *Tc-wg* are severed in wildtype embryos  
 785 after *Tc-eve* RNAi (A). Heat-shock alone does not rescue the defects (B). The morphology of the  
 786 embryo is shown by DAPI staining (A<sup>i</sup> and B<sup>i</sup>). The quadruple HCR in situ staining in those embryos is  
 787 shown in combinations of two genes, respectively (left column) and for each gene separately as  
 788 greyscale picture (right column, respectively). C,D) RNAi in the *hsVSR* line leads to defects  
 789 comparable to wildtype (C, compare with A or B). However, *hs*-treatment does lead emergence of  
 790 stripes (D). E) The expression patterns are shown in wildtype without RNAi treatment.

791

792

793  
794  
795

**Figure 6**

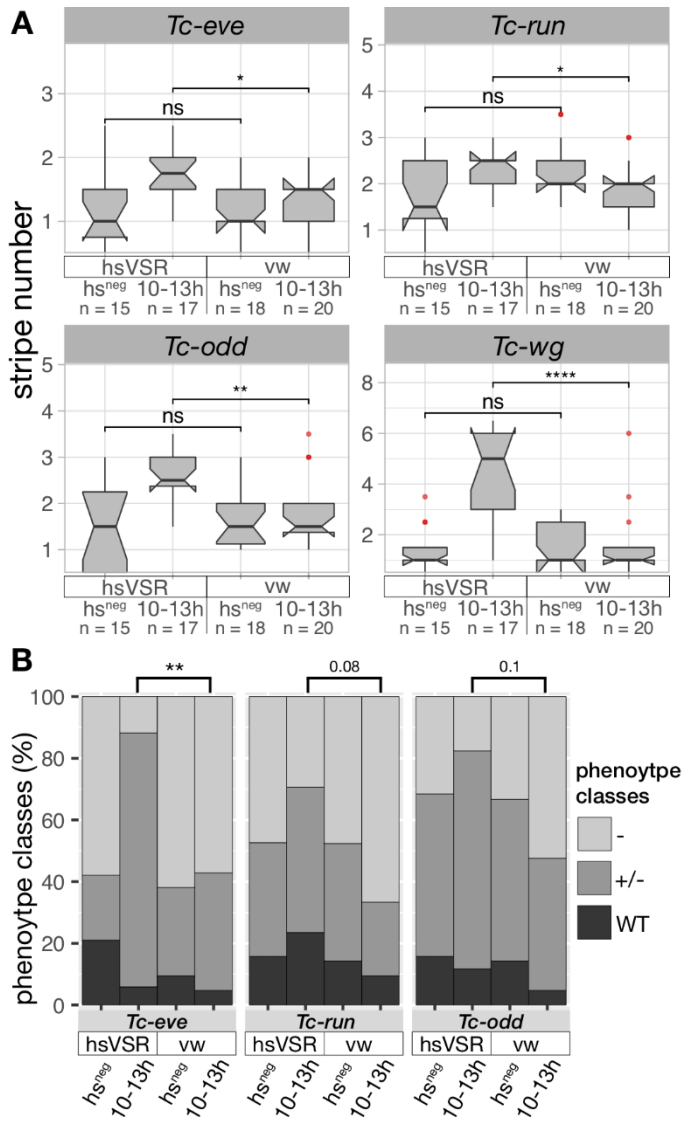

796  
797

**Fig. 6 Quantification of gain of striped pPRG expression after hsVSR treatment**

799 A) The number of pair rule gene and *Tc-wg* stripes increased significantly when comparing the  
800 heat-shocked batches from the hsVSR line and wildtype. B) In an alternative analysis, the resulting  
801 embryos were assigned to three classes: no stripes (-), intermediate (+/-) and close to wildtype (WT).  
802 The p-value for *Tc-eve* reached significance levels while for the other genes the p-value was low but  
803 not significant.
